# Supplementary material for: Circulating Small Extracellular Vesicles Reflect the Severity of Myocardial Damage in STEMI Patients
Source: MDPI journal article supplement (doi:10.3390/biom13101470), 2023-09-29
Supplement: s1 [file s1]

## Circulating small extracellular vesicles reflect the severity of myocardial damage in STEMI patients.

Zarà et al.

### Supplementary Tables

**Table S1:** Relationship between sEVs profile and relevant clinical and CMR features.

|                       | <b>STEMI site: Anterior</b>                   | <b>STEMI site: Non-anterior</b>               | <i>p value</i>    |
|-----------------------|-----------------------------------------------|-----------------------------------------------|-------------------|
| Number (particles/ml) | $4.7 \times 10^{11} \pm 1.07 \times 10^{11}$  | $3.49 \times 10^{11} \pm 9.82 \times 10^{10}$ | <b>0.0001</b>     |
| Dimension (nm)        | $81.49 \pm 13.94$                             | $80.97 \pm 15.50$                             | 0.73              |
|                       | <b>Culprit lesion: LAD</b>                    | <b>Culprit lesion: Other vessels</b>          |                   |
| Number (particles/ml) | $4.4 \times 10^{11} \pm 1.29 \times 10^{11}$  | $3.71 \times 10^{11} \pm 9.77 \times 10^{11}$ | <b>0.045</b>      |
| Dimension (nm)        | $81.92 \pm 13.15$                             | $80.47 \pm 16.33$                             | 0.49              |
|                       | <b>Presentation time: Late</b>                | <b>Presentation time: Early</b>               |                   |
| Number (particles/ml) | $4.4 \times 10^{11} \pm 1.13 \times 10^{11}$  | $3.79 \times 10^{11} \pm 1.18 \times 10^{11}$ | <b>0.038</b>      |
| Dimension (nm)        | $80.68 \pm 13.59$                             | $81.63 \pm 15.66$                             | 0.99              |
|                       | <b>MSI <math>\leq 0.5</math></b>              | <b>MSI <math>&gt; 0.5</math></b>              |                   |
| Number (particles/ml) | $4.02 \times 10^{11} \pm 1.24 \times 10^{11}$ | $4.14 \times 10^{11} \pm 1.12 \times 10^{11}$ | 0.59              |
| Dimension (nm)        | $77.24 \pm 13.44$                             | $88.10 \pm 14.40$                             | <b>0.014</b>      |
|                       | <b>Presence of MVO</b>                        | <b>Absence of MVO</b>                         |                   |
| Number (particles/ml) | $4.1 \times 10^{11} \pm 1.26 \times 10^{11}$  | $4.1 \times 10^{11} \pm 1.17 \times 10^{11}$  | 0.99              |
| Dimension (nm)        | $74.24 \pm 13.74$                             | $86.68 \pm 13.27$                             | <b>&lt; 0.002</b> |

sEVs number and size was evaluated by NTA after isolation from plasma collected 3-5 days post STEMI. Patients were divided according to STEMI site, culprit lesion artery, presentation time (Early < 3 hours, Late  $\geq$  3 hours), MVO presence, MSI (low < 0.5; high > 0.5). Mean  $\pm$  SD are reported. In bold the statistically significant values.

**Table S2:** Correlations between sEV dimension/concentration and clinical/CMR parameters

|                       | sEV concentration     | sEV dimension         |
|-----------------------|-----------------------|-----------------------|
| Peak Troponin         | $r = -0.12; p = 0.42$ | $r = -0.20; p = 0.20$ |
| LVEDVi                | $r = 0.05; p = 0.75$  | $r = -0.16; p = 0.33$ |
| LVESVi                | $r = 0.13; p = 0.40$  | $r = -0.20; p = 0.21$ |
| LVEF                  | $r = -0.14; p = 0.37$ | $r = 0.18; p = 0.25$  |
| LV mass               | $r = 0.10; p = 0.54$  | $r = 0.01; p = 0.96$  |
| RVEDVi                | $r = -0.11; p = 0.50$ | $r = 0.01; p = 0.97$  |
| RVESVi                | $r = -0.11; p = 0.47$ | $r = 0.17; p = 0.30$  |
| RVEF                  | $r = -0.08; p = 0.60$ | $r = -0.19; p = 0.23$ |
| AAR                   | $r = 0.17; p = 0.27$  | $r = -0.02; p = 0.92$ |
| AAR (% LV mass)       | $r = 0.20; p = 0.20$  | $r = -0.06; p = 0.71$ |
| LGE mass              | $r = -0.08; p = 0.63$ | $r = -0.37; p = 0.01$ |
| LGE (% LV mass)       | $r = -0.07; p = 0.65$ | $r = -0.40; p = 0.01$ |
| MVO mass              | $r = 0.09; p = 0.55$  | $r = -0.32; p = 0.04$ |
| MVO mass (% LV mass)  | $r = 0.08; p = 0.62$  | $r = -0.33; p = 0.03$ |
| MVO mass (% LGE mass) | $r = 0.07; p = 0.66$  | $r = -0.39; p = 0.01$ |
| MSI                   | $r = 0.09; p = 0.59$  | $r = 0.13; p = 0.43$  |

AAR: area at risk, CMR: cardiac magnetic resonance, LGE: late gadolinium enhancement, LV: left ventricular, LVEDVi: indexed left end-diastolic volume, LVEF: left ventricular ejection fraction, LVESVi: indexed left end-systolic volume, MVO: microvascular obstruction, MSI: myocardial salvage index, RVEDVi: indexed right end-diastolic volume, RVESVi: indexed right end-systolic volume, RVEF: indexed right end.

**Table S3:** The relation between MACSPlex-antigens and the associated genes.

| Antigens   | Genes    |
|------------|----------|
| CD29       | ITGB1    |
| CD41b      | ITGA2B   |
| CD42a      | GP9      |
| CD9        | CD9      |
| HLA-ABC    | HLA-A    |
| CD81       | CD81     |
| CD56       | NCAM1    |
| CD62P      | SELP     |
| CD24       | CD24     |
| HLA-DRDPDQ | HLA-DRB1 |
| CD31       | PECAM1   |
| CD45       | PTPRC    |
| CD40       | CD40     |
| CD3        | CD3      |
| CD44       | CD44     |
| CD25       | IL2RA    |
| CD2        | CD2      |
| CD8        | CD8A     |
| CD69       | CD69     |
| SSEA-4     | FUT4     |
| CD49e      | ITGA5    |
| CD146      | MCAM     |
| CD105      | ENG      |
| CD63       | CD63     |
| ROR1       | ROR1     |
| CD142      | F3       |
| CD20       | MS4A1    |
| CD11c      | ITGAX    |
| CD14       | CD14     |
| CD1-c      | CD1C     |
| CD4        | CD4      |
| CD209      | CD209    |
| CD86       | CD86     |
| CD133/1    | PROM1    |
| CD19       | CD19     |

Gray antigens denote not expressed antigens.

**Table S4.** Details of pathway analysis.

| ID            | Group                 | Term                                                     | Term p-value | % Associated Genes | Nr. Genes | Associated Genes Found                 |
|---------------|-----------------------|----------------------------------------------------------|--------------|--------------------|-----------|----------------------------------------|
| R-HSA:9013408 | Cell-Cell interaction | RHOG GTPase cycle                                        | 0.008854     | 2.7                | 2         | [ITGB1, MCAM]                          |
| R-HSA:373755  | Cell-Cell interaction | Semaphorin interactions                                  | 0.00689      | 3.08               | 2         | [ITGB1, PTPRC]                         |
| R-HSA:1566948 | Cell-Cell interaction | Elastic fibre formation                                  | 0.0033565    | 4.44               | 2         | [ITGA5, ITGB1]                         |
| R-HSA:76009   | Platelet activation   | Platelet Aggregation (Plug Formation)                    | 0.0025299    | 5.13               | 2         | [GP9, ITGA2B]                          |
| R-HSA:202427  | Cell-Cell interaction | Phosphorylation of CD3 and TCR zeta chains               | 0.0008045    | 9.09               | 2         | [HLA-DRB1, PTPRC]                      |
| R-HSA:416700  | Cell-Cell interaction | Other semaphorin interactions                            | 0.0005976    | 10.53              | 2         | [ITGB1, PTPRC]                         |
| R-HSA:913531  | Immunity              | Interferon Signaling                                     | 0.0005135    | 2.01               | 4         | [CD44, HLA-A, HLA-DRB1, NCAM1]         |
| R-HSA:3000178 | Cell-Cell interaction | ECM proteoglycans                                        | 0.0004006    | 3.95               | 3         | [ITGA2B, ITGB1, NCAM1]                 |
| R-HSA:75892   | Platelet activation   | Platelet Adhesion to exposed collagen                    | 0.0003687    | 13.33              | 2         | [GP9, ITGB1]                           |
| R-HSA:1566977 | Cell-Cell interaction | Fibronectin matrix formation                             | 0.0000532    | 33.33              | 2         | [ITGA5, ITGB1]                         |
| R-HSA:877300  | Immunity              | Interferon gamma signaling                               | 0.0000248    | 4.4                | 4         | [CD44, HLA-A, HLA-DRB1, NCAM1]         |
| R-HSA:76002   | Platelet activation   | Platelet activation, signaling and aggregation           | 0.0000076    | 2.28               | 6         | [CD63, CD9, GP9, ITGA2B, PECAM1, SELP] |
| R-HSA:76005   | Platelet activation   | Response to elevated platelet cytosolic Ca <sup>2+</sup> | 0.0000046    | 3.73               | 5         | [CD63, CD9, ITGA2B, PECAM1, SELP]      |
| R-HSA:198933  | Immunity              | Immunoregulatory interactions between Lymphoid and       | 0.0000043    | 3.79               | 5         | [CD40, CD81, CD8A, HLA-A, ITGB1]       |

|              |                       |                                                |           |       |   |                                         |
|--------------|-----------------------|------------------------------------------------|-----------|-------|---|-----------------------------------------|
|              |                       | non-Lymphoid cells                             |           |       |   |                                         |
| R-HSA:114608 | Platelet activation   | Platelet degranulation                         | 0.0000038 | 3.88  | 5 | [CD63, CD9, ITGA2B, PECAM1, SELP]       |
| R-HSA:373760 | Cell-Cell interaction | L1CAM interactions                             | 0.0000026 | 4.2   | 5 | [CD24, ITGA2B, ITGA5, ITGB1, NCAM1]     |
| R-HSA:216083 | Cell-Cell interaction | Integrin cell surface interactions             | 0.0000005 | 5.88  | 5 | [CD44, ITGA2B, ITGA5, ITGB1, PECAM1]    |
| R-HSA:202733 | Cell-Cell interaction | Cell surface interactions at the vascular wall | 0.0000002 | 4.38  | 6 | [CD2, CD44, ITGA5, ITGB1, PECAM1, SELP] |
| R-HSA:445144 | Cell-Cell interaction | Signal transduction by L1                      | 0.0000001 | 19.05 | 4 | [ITGA2B, ITGA5, ITGB1, NCAM1]           |

**Table S5:** Correlations between CD41-CD61 expression and clinical/CMR parameters

| CD41-CD61 expression  |                       |
|-----------------------|-----------------------|
| Peak Troponin         | $r = -0.09; p = 0.55$ |
| LVEDVi                | $r = -0.03; p = 0.83$ |
| LVESVi                | $r = -0.15; p = 0.34$ |
| LVEF                  | $r = 0.31; p = 0.04$  |
| LV mass               | $r = 0.05; p = 0.76$  |
| RVEDVi                | $r = 0.16; p = 0.32$  |
| RVESVi                | $r = 0.01; p = 0.94$  |
| RVEF                  | $r = 0.19; p = 0.22$  |
| AAR                   | $r = -0.18; p = 0.25$ |
| AAR (% LV mass)       | $r = -0.21; p = 0.19$ |
| LGE mass              | $r = -0.20; p = 0.19$ |
| LGE (% LV mass)       | $r = -0.20; p = 0.20$ |
| MVO mass              | $r = -0.40; p = 0.01$ |
| MVO mass (% LV mass)  | $r = -0.39; p = 0.01$ |
| MVO mass (% LGE mass) | $r = -0.35; p = 0.02$ |
| MSI                   | $r = 0.19; p = 0.24$  |

AAR: area at risk, CMR: cardiac magnetic resonance, LGE: late gadolinium enhancement, LV: left ventricular, LVEDVi: indexed left end-diastolic volume, LVEF: left ventricular ejection fraction, LVESVi: indexed left end-systolic volume, MVO: microvascular obstruction, MSI: myocardial salvage index, RVEDVi: indexed right end-diastolic volume, RVESVi: indexed right end-systolic volume, RVEF: indexed right end.

**Table S6.** sEV characteristics analyzed according to gender.

|                               | <b>Male</b>                                   | <b>Female</b>                                 | <i>p</i> |
|-------------------------------|-----------------------------------------------|-----------------------------------------------|----------|
| Number (particles/ml)         | $4.19 \times 10^{11} \pm 1.20 \times 10^{11}$ | $3.76 \times 10^{11} \pm 1.19 \times 10^{11}$ | 0.27     |
| Dimension (nm)                | $81.82 \pm 15.58$                             | $76.86 \pm 10.99$                             | 0.51     |
| CD41-CD61 expression (ng/sEV) | $9.2\text{e-}009 \pm 8.2\text{e-}009$         | $8.7\text{e-}009 \pm 2.9\text{e-}009$         | 0.41     |

**Table S7.** Correlation between sEV parameters and age of patients

|                       | <b>r</b> | <b>p</b> |
|-----------------------|----------|----------|
| Number (particles/ml) | 0.06     | 0.68     |
| Dimension (nm)        | -0.18    | 0.25     |
| CD41-CD61 expression  | -0.17    | 0.27     |



**Table S8.** ROC analysis

|               | <b>AUC</b> | <b>95% CI</b> |
|---------------|------------|---------------|
| Concentration | 0.53       | 0.34-0.70     |
| Size          | 0.75       | 0.59-0.90     |
| CD41-CD61     | 0.71       | 0.55-0.86     |
| Peak Troponin | 0.84       | 0.74-0.97     |
| Model         | 0.95       | 0.89-1.00     |

AUC: area under the curve, CI: confidence interval

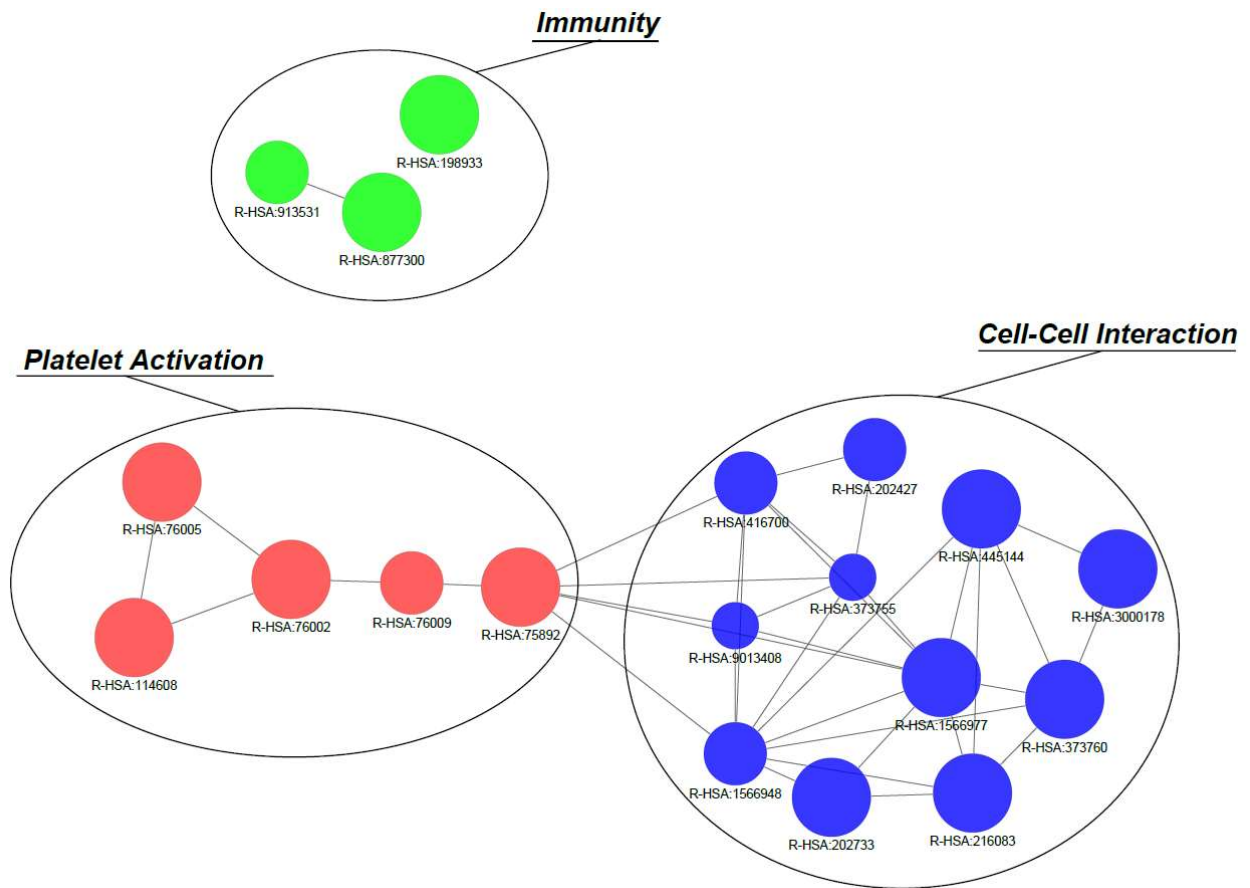

**Figure S1: Network graph summarizing pathways analysis results, performed using the expressed antigens.** Each node represents a specific Reactome pathway while the links thickness denotes the overlapping degree (k-score) between nodes. The node size reflects the significance: the higher the node, the more significant the pathway.
